# Supplementary material for: High-performance supercapacitor electrode of Cu2ZnSnS4 (CZTS) thin films grown by ECD
Source: Royal Society of Chemistry journal article supplement (doi:10.1039/d4nr04737k), 2025-01-01
Supplement: d4nr04737k1.pdf [file d4nr04737k1.pdf]

## Supporting Information for:

### High Supercapacitor Electrode Performance of $\text{Cu}_2\text{ZnSnS}_4$ (CZTS) Thin Films Grown by ECD

Kübra Çınar Demir<sup>a,b,\*</sup>, Zeynep Orhan<sup>a</sup>, Şakir Aydoğan<sup>a</sup> and Mehmet Yilmaz<sup>b,c</sup>

<sup>a</sup>Ataturk University, Faculty of Sciences, Department of Physics, 25240 Erzurum, Turkey

<sup>b</sup>Advanced Materials Research Laboratory, Department of Nanoscience and Nanoengineering, Graduate School of Natural and Applied Sciences, Ataturk University, 25240, Erzurum, Turkey

<sup>c</sup>Department of Science Teaching, Education Faculty, Suleyman Demirel University, 32260, Isparta, Turkey

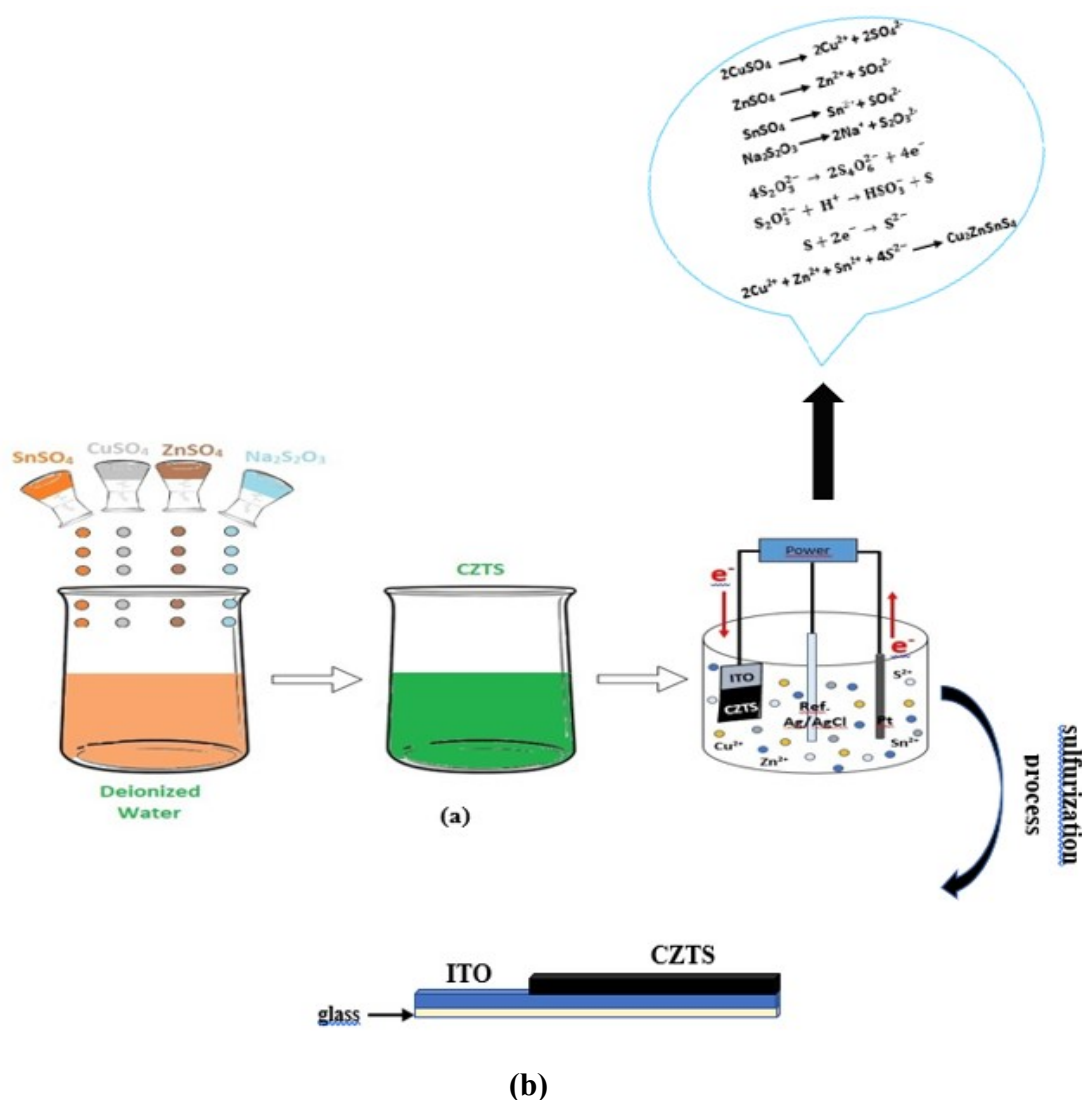

**Fig. S1.** Schematic presentation of CZTS TFs grown by ECD on ITO substrate at room temperature (b) A schematic illustration of the CZTS electrode deposited on an ITO substrate

Fig. S1(a) shows schematic procedure of CZTS TFs grown by ECD on ITO substrate. In a standard experimental setup, 50 mL of deionized water was used as the solvent for the following reagents: 0.02 M copper sulfate, 0.1 M zinc sulfate heptahydrate, 0.02 M tin sulphate, 0.02 M sodium thiosulphate, and 0.2 M sodium citrate tribasic. The solution was prepared while maintaining constant magnetic stirring. Before the deposition process, the ITO substrates were subjected to ultrasonic cleaning for five minutes in acetone, methanol, and trichloroethylene, in sequence. Following this, the substrates were rinsed with deionized water for five minutes and allowed to dry. After cleaning, the ITO films were annealed at 400°C for 30 minutes in a nitrogen atmosphere. The electrochemical deposition (ECD) technique was then utilized to deposit CZTS thin films onto the ITO-coated glass substrates at ambient temperature. Also, the experimental apparatus employed an Interface 1000 electrochemical workstation, which was integrated with a three-electrode system. In this configuration, an Ag/AgCl electrode was used as the reference electrode, a platinum (Pt) electrode served as the counter electrode, and an ITO-coated substrate functioned as the working electrode. All measurements and processes were conducted at room temperature, as depicted in Fig. S1(a). Table S1 presents the detailed electrochemical deposition parameters utilized for the growth of CZTS TFs on ITO-coated substrates. These parameters include key factors such as deposition time, applied voltage, solution composition, and temperature conditions, which were carefully controlled during the electrochemical process to achieve optimal film characteristics. The electrodeposition of Cu–Zn–Sn and sulfur species from a single solution presents a challenge due to the distinct oxidation and reduction potentials of their respective ions (Cu(II), Zn(II), Sn(IV), and Sn(II)). Therefore, Cyclic Voltammetry (CV) measurement was conducted with a scan rate of 50 mV/s, covering a potential range from 0 to -1.5 V, in a solution containing Cu, Zn, Sn, and S species, along with trisodium citrate before deposition [1]. Then, all depositions were carried out at room temperature under a cathodic potential of -1.05 V as given in table1[2]. The CZTS solution prepared at pH 5, was used for the growth of CZTS TFs and the growth process was carried out over a period of 2700 s using the experimental setup with a three-electrode system (as shown in Fig. 1(a)). The deposited films were extensively rinsed with deionized water and subsequently dried using a nitrogen gas flow. Then, the films were subjected to an annealing treatment at 580°C for one hour, in the presence of 0.5 g of sulfur powder, under a nitrogen atmosphere to perform the sulfurization process. Fig. S1(b) shows schematic presentation of the CZTS electrode electrodeposited on ITO substrate prepared for the electrochemical measurements.

**Table S1.** Deposition parameters of CZTS TFs electrodeposited on ITO substrate at room temperature

| Deposition Parameters |               |    |          |                                                                                                                                                                                                                              |
|-----------------------|---------------|----|----------|------------------------------------------------------------------------------------------------------------------------------------------------------------------------------------------------------------------------------|
| CIS/ITO               | Potential (V) | pH | Time (s) | Molarity                                                                                                                                                                                                                     |
| As-deposited          | -1.05         | 5  | 2700     | 0.02M CuSO <sub>4</sub><br>0.01M ZnSO <sub>4</sub> .7H <sub>2</sub> O<br>0.02M SnSO <sub>4</sub><br>0.02M Na <sub>2</sub> S <sub>2</sub> O <sub>3</sub><br>0.2M Na <sub>3</sub> C <sub>6</sub> H <sub>5</sub> O <sub>7</sub> |

**Table S2.** The calculated results of 2 $\theta$ , FWHM, d, and D of the CZTS TF obtained from XRD plot and the capacitance values obtained from CV at different scan rates

| XRD data         |                        |                     |                             |        |
|------------------|------------------------|---------------------|-----------------------------|--------|
| (hkl)            | Pos. (°2 $\theta$ )    | FWHM (°2 $\theta$ ) | <i>d</i> -spacing (Å)       | D (nm) |
| (210)            | 26.78                  | 0.197               | 3.326                       | 75.56  |
| (112)            | 28.95                  | 0.162               | 3.082                       | 92.32  |
| (211)            | 38.38                  | 0.454               | 2.343                       | 33.77  |
| (220)            | 47.75                  | 0.270               | 1.903                       | 58.65  |
| (322)            | 54.55                  | 0.340               | 1.681                       | 47.92  |
| (312)            | 56.60                  | 0.348               | 1.625                       | 47.26  |
| CV data          |                        |                     |                             |        |
| Scan rate (mV/s) | Area                   |                     | Capacitance (from CV) (F/g) |        |
| 1                | 4.746x10 <sup>-4</sup> |                     | 1483                        |        |
| 5                | 6.18 x10 <sup>-4</sup> |                     | 386                         |        |
| 10               | 6.01 x10 <sup>-4</sup> |                     | 187                         |        |
| 25               | 9.52 x10 <sup>-4</sup> |                     | 119                         |        |
| 50               | 1.45 x10 <sup>-4</sup> |                     | 90                          |        |
| 100              | 2.36 x10 <sup>-4</sup> |                     | 73                          |        |

**Table S3.** Comparison of the electrode materials' electrochemical properties performed on various substrates at different scan rates and current densities

| <b>Electrode</b>                        | <b>Specific Capacitance (Fg<sup>-1</sup>)</b> | <b>Current Density or scan rate</b> | <b>Deposition technique</b>             | <b>Cycle numbers</b> | <b>Ref.</b> |
|-----------------------------------------|-----------------------------------------------|-------------------------------------|-----------------------------------------|----------------------|-------------|
| CZTS on ITO                             | 1695                                          | 1 Ag <sup>-1</sup>                  | ECD                                     | 5000                 | our work    |
| CZTS/RGO                                | 248.5                                         | 1 Ag <sup>-1</sup>                  | hydro thermal                           | 1000                 | [3]         |
| CZTS/p-PDA nanocomposite                | 424.6                                         | 0.1 Ag <sup>-1</sup>                | chemical process                        | 10000                | [4]         |
| CZTS/PANI nanocomposites                | 371                                           | 2.5 Ag <sup>-1</sup>                | an in-situ supercritical water reaction | 1000                 | [5]         |
| Cu <sub>2</sub> ZnSnS <sub>4</sub> inks | 1709                                          | 0.5 mV/s                            | chemical process                        | -                    | [6]         |
| CZTS on glass substrate                 | 165.04                                        | 1 Ag <sup>-1</sup>                  | SILAR                                   | 1000                 | [7]         |
| PANI:CZTS nanocomposites                | 311                                           | 0.1 Ag <sup>-1</sup>                | hydro thermal                           | 10000                | [8]         |
| CZTS based carbon nanocomposities       | 171                                           | 0.5 mV/s                            | chemical                                | 3000                 | [9]         |

- [1] Demir K Ç 2021 The investigation of the corrosion behavior of CZTS thin films prepared via electrodeposition *Mater. Sci. Semicond. Process.* **123** 105553
- [2] Pawar S M, Pawar B S, Moholkar A V, Choi D S, Yun J H, Moon J H, Kolekar S S and Kim J H 2010 Single step electrosynthesis of  $\text{Cu}_2\text{ZnSnS}_4$  (CZTS) thin films for solar cell application *Electrochim. Acta* **55** 4057–61
- [3] Tang Q, Shen H, Yao H, Wang W, Jiang Y and Zheng C 2016 Synthesis of CZTS/RGO composite material as supercapacitor electrode *Ceram. Int.* **42** 10452–8
- [4] Colak S G, Gungor A, Colak M O A, Genc R and Erdem E 2024 CZTS/phenylenediamine isomer nanocomposite electrodes for supercapacitor applications *J. Energy Storage* **99** 113423
- [5] Sabanhalli C, Roy K, Kumar M P, Mudike R, S A K C, Shivaramu P D, Kumar K G B, Basavegowda N and Rangappa D 2022 Supercritical fluid synthesized  $\text{Cu}_2\text{ZnSnS}_4$ -Polyaniline nanocomposites for supercapacitor application *Ceram. Int.* **48** 35860–6
- [6] Huang T J, Zhang L, Shi D, Qi G and Gong H 2018 Dual use of  $\text{Cu}_2\text{ZnSnS}_4$  in solar cells and energy storage devices *Sol. Energy Mater. Sol. Cells* **180** 328–33
- [7] Murugan A, Siva V, Shameem A samad and Bahadur S A 2021 Effect of Zn on nanoscale quaternary  $\text{Cu}_2\text{ZnSnS}_4$  thin film electrodes for high performance supercapacitors *J. Energy Storage* **44** 103423
- [8] Güngör A, Çolak S G, Alaş Çolak M Ö, Genç R and Erdem E 2024 Polyaniline: $\text{Cu}_2\text{ZnSnS}_4$  (PANI:CZTS) nanocomposites as electrodes in all-in-one supercapacitor devices *Electrochim. Acta* **480** 143924
- [9] Colak S G, Simsek U B, Aydın H, Kurtan Ü and Demir M 2025 Enhanced supercapacitor performance with CZTS-based carbon nanocomposites electrodes: An electrochemical study *J. Colloid Interface Sci.* **682** 478–90
